# Supplementary material for: A molecular dynamics study of CaCO3 nanoparticles in a hydrophobic solvent with a stearate co-surfactant
Source: Royal Society of Chemistry journal article supplement (doi:10.1039/c5cp00428d), 2015-01-01
Supplement: c5cp00428d1.pdf [file c5cp00428d1.pdf]

Molecular Dynamics study of  $\text{CaCO}_3$   
nanoparticles in hydrophobic solvent with  
stearate co-surfactant: Supporting Information

Michael S. Bodnarchuk\*    David M. Heyes<sup>†</sup>    Daniele Dini<sup>‡</sup>  
Angela Breakspear<sup>§</sup>    Samir Chahine<sup>¶</sup>

January 23, 2015

---

\*Department of Mechanical Engineering, Imperial College London, Exhibition Road, London, SW7, UK,  
E-mail: [m.bodnarchuk@imperial.ac.uk](mailto:m.bodnarchuk@imperial.ac.uk)

<sup>†</sup>Department of Mechanical Engineering, Imperial College London, Exhibition Road, London, SW7, UK

<sup>‡</sup>Department of Mechanical Engineering, Imperial College London, Exhibition Road, London, SW7, UK

<sup>§</sup>BP Technology Centre, Whitchurch Hill, Pangbourne, RG8 7QR, UK

<sup>¶</sup>BP Technology Centre, Whitchurch Hill, Pangbourne, RG8 7QR, UK

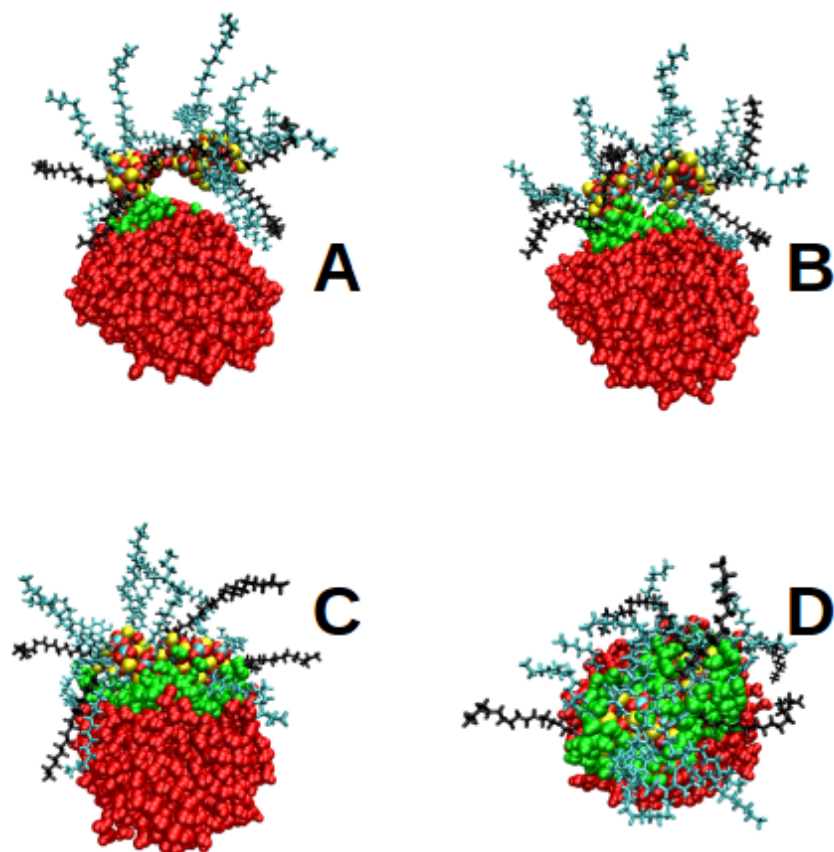

Figure 1: MD snapshots during a 20 ns simulation of a salicylate/stearate nanoparticle and a representative water droplet, showing the successive stages of a) initial bridge formation, b) bridge development, c) water coating of the nanoparticle, and d) full nanoparticle adsorption into the water drop. Water molecules within  $7 \text{ \AA}$  of the nanoparticle are shown as green spheres, with rest represented by red spheres. Calcium ions are shown in yellow. The cyan and red spheres represent the carbon and oxygen atoms, respectively of the carbonate ions. The salicylate surfactants are shown in cyan, with the stearate co-surfactant shown in black.
